# Supplementary material
Source: PubMed Central journal article supplement (PMC1160120)
Supplement: nar_33_suppl-2_W105__1.pdf [file nar_33_suppl-2_W105__1.pdf]

Appendix I: LOCSVMPSI: a web server for subcellular  
localization of eukaryotic proteins using SVM and profile of  
PSI-BLAST

Dan Xie<sup>1</sup>, Ao Li<sup>1</sup>, Minghui Wang<sup>1</sup>, Zhewen Fan<sup>2</sup>, Huanqing Feng<sup>1\*</sup>,

<sup>1</sup>*Department of Electronic Science and Technology, University of Science and Technology of  
China, Hefei, P R, China*

<sup>2</sup>*Department of Biomedical Engineering, City University of New York, New York, U.S.A*

***Confusion matrices for all prediction analyses in original paper***

Each row in the confusion matrix is the distribution of the predicted location given the corresponding true subcellular location, and each column is the distribution of the true location given the corresponding predicted subcellular location. “Total” denotes the total number of proteins belonging to one of the four subcellular locations in each row or column of the confusion matrix.

**Table S1. Confusion matrix of LOCSVMPSI on the RH-2427 data set\***

|                | Cytoplasmic | Extra-cellular | Mitochondrial | Nuclear | Total |
|----------------|-------------|----------------|---------------|---------|-------|
| Cytoplasmic    | 592         | 6              | 22            | 64      | 684   |
| Extra-cellular | 6           | 301            | 4             | 14      | 325   |
| Mitochondrial  | 25          | 4              | 258           | 34      | 321   |
| Nuclear        | 40          | 4              | 16            | 1037    | 1097  |
| Total          | 663         | 315            | 300           | 1149    | 2427  |

\*Results in this table were obtained by using a jackknife test on the RH-2427 data set

**Table S2. Confusion matrix of LOCSVMPSI on the RK-7579 data set\***

|       | C1  | C2   | C3 | C4 | C5  | C6 | C7 | C8  | C9   | C10 | C11  | C12 | Total |
|-------|-----|------|----|----|-----|----|----|-----|------|-----|------|-----|-------|
| C1    | 513 | 52   | 0  | 0  | 3   | 0  | 0  | 48  | 47   | 1   | 6    | 1   | 671   |
| C2    | 30  | 948  | 1  | 2  | 17  | 1  | 2  | 55  | 162  | 3   | 18   | 2   | 1241  |
| C3    | 0   | 3    | 24 | 0  | 0   | 0  | 0  | 0   | 12   | 1   | 0    | 0   | 40    |
| C4    | 1   | 16   | 0  | 70 | 10  | 0  | 2  | 4   | 6    | 0   | 5    | 0   | 114   |
| C5    | 5   | 13   | 0  | 2  | 772 | 0  | 9  | 9   | 35   | 2   | 10   | 4   | 861   |
| C6    | 1   | 11   | 0  | 0  | 2   | 22 | 0  | 1   | 10   | 0   | 0    | 0   | 47    |
| C7    | 0   | 2    | 0  | 0  | 22  | 0  | 58 | 2   | 2    | 2   | 4    | 1   | 93    |
| C8    | 49  | 69   | 0  | 0  | 13  | 0  | 0  | 496 | 84   | 5   | 10   | 1   | 727   |
| C9    | 11  | 94   | 0  | 1  | 20  | 3  | 0  | 17  | 1767 | 0   | 19   | 0   | 1932  |
| C10   | 4   | 29   | 0  | 0  | 2   | 0  | 0  | 21  | 5    | 52  | 12   | 0   | 125   |
| C11   | 7   | 17   | 0  | 1  | 14  | 0  | 2  | 12  | 33   | 1   | 1586 | 1   | 1674  |
| C12   | 1   | 5    | 0  | 0  | 13  | 0  | 1  | 3   | 8    | 0   | 1    | 22  | 54    |
| Total | 622 | 1259 | 25 | 76 | 888 | 26 | 74 | 668 | 2171 | 67  | 1671 | 32  | 7579  |

\*Results in this table were obtained by using 5-fold cross validation test on the RK-759 data set. Abbreviations used in this table are: C1: chloroplast proteins; C2: cytoplasmic proteins; C3: cytoskeleton proteins; C4: ER proteins; C5: extracellular proteins; C6: golgi apparatus proteins; C7: lysosomal proteins; C8: mitochondrial proteins; C9: nuclear proteins; C10: peroxisomal proteins; C11: plasma membrane proteins; C12: vacuolar proteins. More details about this data set can be found at <http://web.kuicr.kyoto-u.ac.jp/~park/Seqdata/>

**Table S3. Confusion matrix of LOCSVMPSI on the SWISS-PROT new-unique data set with the model trained with the RH-2427 data set\***

|                | Cytoplasmic | Extra-cellular | Mitochondrial | Nuclear | Total |
|----------------|-------------|----------------|---------------|---------|-------|
| Cytoplasmic    | 101         | 0              | 8             | 37      | 146   |
| Extra-cellular | 7           | 82             | 4             | 35      | 128   |
| Mitochondrial  | 5           | 0              | 51            | 4       | 60    |
| Nuclear        | 28          | 3              | 6             | 141     | 178   |
| Total          | 141         | 85             | 69            | 217     | 512   |

\* Results in this table were obtained by using the whole RH-2427 data set as the training set and evaluating the prediction performance of LOCSVMPSI on the SWISS-PROT new-unique data set.

**Table S4. Confusion matrix of LOCSVMPSI on the SWISS-PROT new-unique data set with the model trained with the PK-7579 data set\***

|       | C1 | C2  | C3 | C4 | C5  | C6 | C7 | C8 | C9  | C10 | C11 | C12 | Total |
|-------|----|-----|----|----|-----|----|----|----|-----|-----|-----|-----|-------|
| C1    | 0  | 0   | 0  | 0  | 0   | 0  | 0  | 0  | 0   | 0   | 0   | 0   | 0     |
| C2    | 4  | 108 | 0  | 0  | 1   | 0  | 0  | 1  | 30  | 1   | 1   | 0   | 146   |
| C3    | 0  | 0   | 0  | 0  | 0   | 0  | 0  | 0  | 0   | 0   | 0   | 0   | 0     |
| C4    | 0  | 0   | 0  | 0  | 0   | 0  | 0  | 0  | 0   | 0   | 0   | 0   | 0     |
| C5    | 0  | 5   | 0  | 0  | 98  | 0  | 2  | 2  | 19  | 0   | 1   | 1   | 128   |
| C6    | 0  | 0   | 0  | 0  | 0   | 0  | 0  | 0  | 0   | 0   | 0   | 0   | 0     |
| C7    | 0  | 0   | 0  | 0  | 0   | 0  | 0  | 0  | 0   | 0   | 0   | 0   | 0     |
| C8    | 1  | 3   | 0  | 1  | 0   | 0  | 0  | 53 | 2   | 0   | 0   | 0   | 60    |
| C9    | 0  | 11  | 0  | 0  | 4   | 1  | 0  | 7  | 150 | 0   | 5   | 0   | 178   |
| C10   | 0  | 0   | 0  | 0  | 0   | 0  | 0  | 0  | 0   | 0   | 0   | 0   | 0     |
| C11   | 0  | 0   | 0  | 0  | 0   | 0  | 0  | 0  | 0   | 0   | 0   | 0   | 0     |
| C12   | 0  | 0   | 0  | 0  | 0   | 0  | 0  | 0  | 0   | 0   | 0   | 0   | 0     |
| Total | 5  | 127 | 0  | 1  | 103 | 1  | 2  | 63 | 201 | 1   | 7   | 1   | 512   |

\* Results in this table were obtained by using the whole PK-7579 data set as the training set and evaluating the prediction performance of LOCSVMPSI on the SWISS-PROT new-unique data set. Abbreviations used in this table are: C1: chloroplast proteins; C2: cytoplasmic proteins; C3: cytoskeleton proteins; C4: ER proteins; C5: extracellular proteins; C6: golgi apparatus proteins; C7: lysosomal proteins; C8: mitochondrial proteins; C9: nuclear proteins; C10: peroxisomal proteins; C11: plasma membrane proteins; C12: vacuolar proteins. More details about this data set can be found at <http://web.kuicr.kyoto-u.ac.jp/~park/Seqdata/>
